RESEARCH ARTICLE

# Abiotic Stresses Downregulate Key Genes Involved in Nitrogen Uptake and Assimilation in *Brassica juncea* L.

Parul Goel<sup>1,2</sup>, Anil Kumar Singh<sup>1,2\*</sup>

**1** CSIR-Institute of Himalayan Bioresource Technology, Palampur-176 061 (HP), India, **2** Academy of Scientific and Innovative Research, New Delhi, India

\* [anil@ihbt.res.in](mailto:anil@ihbt.res.in); [anils13@gmail.com](mailto:anils13@gmail.com)

## Abstract

Abiotic stresses such as salinity, drought and extreme temperatures affect nitrogen (N) uptake and assimilation in plants. However, little is known about the regulation of N pathway genes at transcriptional level under abiotic stress conditions in *Brassica juncea*. In the present work, genes encoding nitrate transporters (NRT), ammonium transporters (AMT), nitrate reductase (NR), nitrite reductase (NiR), glutamine synthetase (GS), glutamate synthase (GOGAT), glutamate dehydrogenase (GDH), asparagine synthetase (ASN) were cloned from *Brassica juncea* L. var. Varuna. The deduced protein sequences were analyzed to predict their subcellular localization, which confirmed localization of all the proteins in their respective cellular organelles. The protein sequences were also subjected to conserved domain identification, which confirmed presence of characteristic domains in all the proteins, indicating their putative functions. Moreover, expression of these genes was studied after 1h and 24h of salt (150 mM NaCl), osmotic (250 mM Mannitol), cold (4°C) and heat (42°C) stresses. Most of the genes encoding nitrate transporters and enzymes responsible for N assimilation and remobilization were found to be downregulated under abiotic stresses. The expression of *BjAMT1.2*, *BjAMT2*, *BjGS1.1*, *BjGDH1* and *BjASN2* was downregulated after 1hr, while expression of *BjNRT1.1*, *BjNRT2.1*, *BjNiR1*, *BjAMT2*, *BjGDH1* and *BjASN2* was downregulated after 24h of all the stress treatments. However, expression of *BjNRT1.1*, *BjNRT1.5* and *BjGDH2* was upregulated after 1h of all stress treatments, while no gene was found to be upregulated after 24h of stress treatments, commonly. These observations indicate that expression of most of the genes is adversely affected under abiotic stress conditions, particularly under prolonged stress exposure (24h), which may be one of the reasons of reduction in plant growth and development under abiotic stresses.

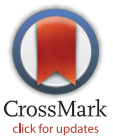

## OPEN ACCESS

**Citation:** Goel P, Singh AK (2015) Abiotic Stresses Downregulate Key Genes Involved in Nitrogen Uptake and Assimilation in *Brassica juncea* L. PLoS ONE 10(11): e0143645. doi:10.1371/journal.pone.0143645

**Editor:** Prabodh Kumar Trivedi, CSIR-National Botanical Research Institute, INDIA

**Received:** October 6, 2015

**Accepted:** November 6, 2015

**Published:** November 25, 2015

**Copyright:** © 2015 Goel, Singh. This is an open access article distributed under the terms of the [Creative Commons Attribution License](https://creativecommons.org/licenses/by/4.0/), which permits unrestricted use, distribution, and reproduction in any medium, provided the original author and source are credited.

**Data Availability Statement:** All relevant data are within the paper and its Supporting Information files.

**Funding:** The authors received no specific funding for this work.

**Competing Interests:** The authors have declared that no competing interests exist.

## Introduction

Nitrogen (N) is a primary plant nutrient that plays a crucial role in determining plant growth and productivity. Plants require nitrogen for the synthesis of vital molecules, such as proteins,

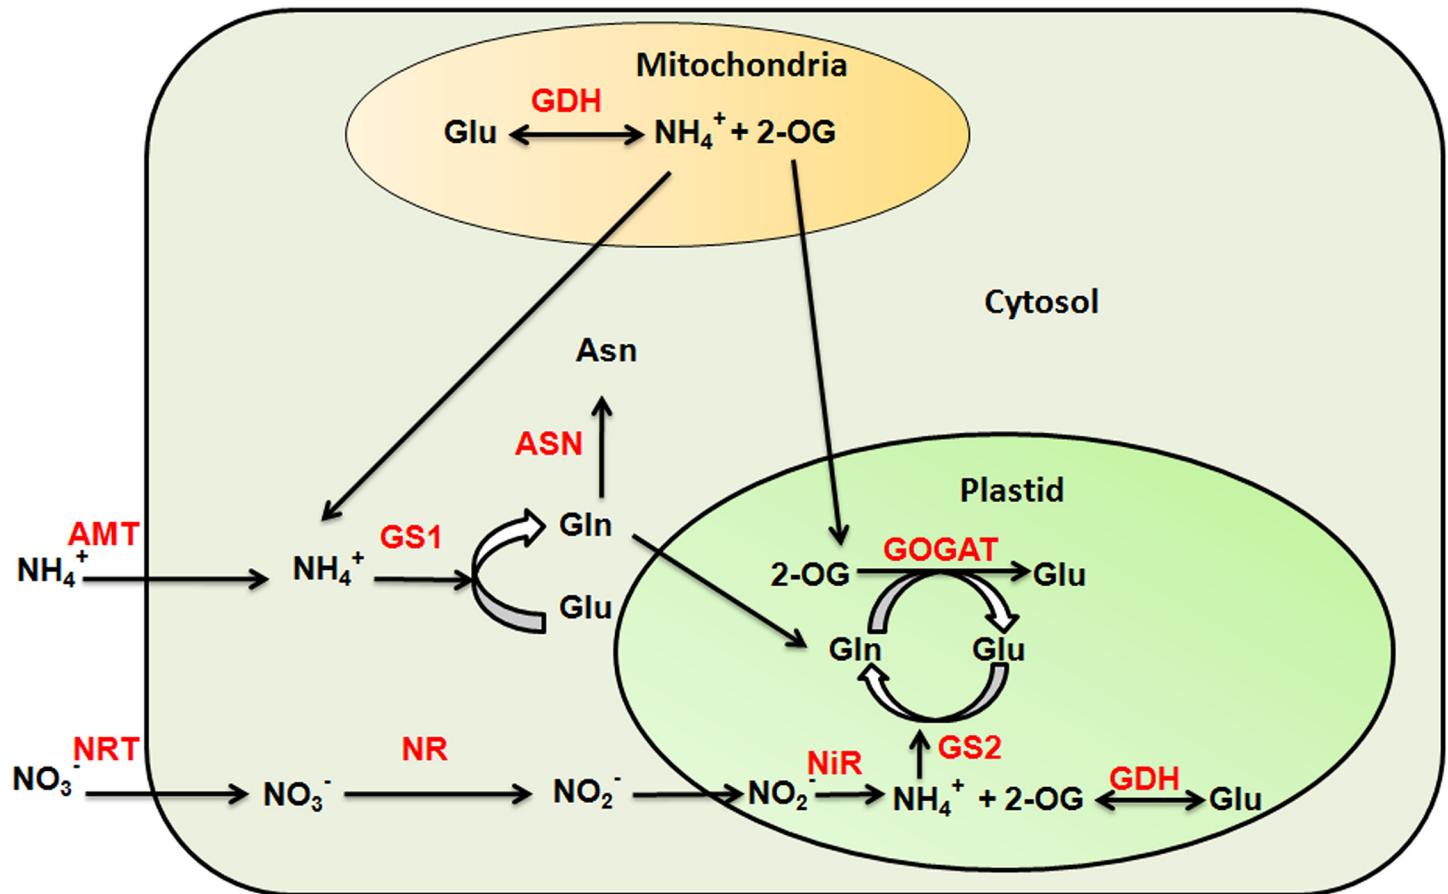

**Fig 1. Nitrogen uptake and assimilation process in plants.** The uptake of nitrate ( $\text{NO}_3^-$ ) and ammonium ( $\text{NH}_4^+$ ) ions is mediated by nitrate (NRT) and ammonium transporters (AMT), respectively. The  $\text{NO}_3^-$  entered into the cell is reduced to nitrite ions ( $\text{NO}_2^-$ ) by an enzyme nitrate reductase (NR). The nitrite ion then moves to plastid and reduced to ammonium ion by nitrite reductase (NiR) enzyme. The ammonium is then incorporated into amino acid by glutamine synthetase and glutamate synthase via GS/GOGAT cycle. The ammonium ion transported by ammonium transporters directly enters into GS/GOGAT cycle. The two additional enzymes glutamate dehydrogenase (GDH) and asparagine synthetase (ASN) also participates in ammonium assimilation. The GS, GDH and ASN are the key enzymes involved in synthesis of glutamine (Gln), Glutamate (Glu) and Asparagine (Asn).

doi:10.1371/journal.pone.0143645.g001

nucleic acids and chlorophyll. Most plant species are capable to absorb and assimilate nitrate ( $\text{NO}_3^-$ ) and ammonium ( $\text{NH}_4^+$ ). In plants uptake of nitrate and ammonium is an active process mediated by nitrate transporters (NRT) and ammonium transporters (AMT), respectively. The nitrogen assimilation involves reduction of nitrate to ammonium which is finally incorporated into amino acids by the process of ammonia assimilation (Fig 1). In plants, several processes, including N uptake and assimilation are known to be adversely affected by abiotic stresses, such as salinity, drought, and extreme temperatures. The uptake of nitrogen, its translocation from root to shoot and finally its assimilation has been found to be affected by high salinity in cowpea [1]. Nitrogen use efficiency (NUE) was also reported to be reduced significantly with increased salinity conditions in chile pepper [2]. During high salt stress,  $\text{Na}^+$  ions disrupt the membrane integrity of plant roots by displacing the  $\text{Ca}^{2+}$  ions that maintains the integrity of the membrane [3]. The high salinity has been shown to inhibit the activity of many enzymes involved in nitrogen assimilation in maize, mung bean and tomato [4–7]. Similarly under drought stress, activities of nitrate reductase (NR) and glutamine synthetase (GS) were found to be reduced in barley [8]. In case of wheat, drought stress was shown to limit the nitrogen translocation during grain filling, resulting in to low grain yield [9]. High temperature has also

been shown to inhibit the nitrate uptake and assimilation in creeping bentgrass, wheat and rice [10–13].

*Brassica juncea* is an important oilseed crop worldwide. Increased level of salinity was found to reduce the activities of various enzymes involved in nitrogen assimilation, viz. NR, NiR, GS, GOGAT and GDH in *B. juncea* [14,15]. Salinity stress was also found to reduce the biomass, shoot and root length and CO<sub>2</sub> assimilation rate in *B. juncea* [16]. High temperature was found to adversely affect certain morpho-physiological parameters such as leaf area index, crop growth rate, chlorophyll stability, abortion of flower and also reduces the nitrogen, phosphorous and potassium content in *B. juncea* [17–20]. Drought stress was also found to adversely affect both dry matter and seed yield of mustard and canola [21]. Effect of drought stress on twenty two advanced breeding lines of *B. juncea* was studied, which showed that the process of photosynthesis, transpiration, water use efficiency and other morpho-physiological characters were adversely affected [22]. The effect of drought on yield and yield components was also investigated on fourteen different genotypes of Indian mustard under irrigated and rain fed conditions, which showed that plant height, primary and secondary branches per plant and seed yield were inhibited [23]. Most of these studies have been done to study the effect of abiotic stresses on morphological and physiological characteristics.

Several transgenics overexpressing genes of N pathway have shown improved tolerance against abiotic stresses. Transgenic tobacco overexpressing NR gene showed retention of 50% NR activity under drought stress as compared to untransformed plants, where NR activity was not detected [24]. Overexpression of chloroplast GS2 has resulted in enhanced salt tolerance in transgenic rice [25]. Ectopic overexpression of pine cytoplasmic glutamine synthetase (GS1) in transgenic poplar showed enhanced tolerance to drought stress [26]. However, overexpression of *OsGS1;2* gene in rice conferred higher sensitivity to salt, drought and cold stress [27]. The overexpression of *OsGS* gene in transgenic rice enhanced tolerance to cadmium stress by modulating the oxidative stress response [28]. Overexpression of *E. coli gdhA* conferred tolerance under water deficit conditions in transgenic tobacco and maize [29–31]. These studies clearly showed that by improving the nitrogen use efficiency of plants, optimum plant growth and productivity may be obtained under stress condition. However, little is known about the regulation of N pathway genes at transcriptional level under abiotic stress conditions. In the present study, we have cloned twenty six genes encoding nitrate and ammonium transporters and enzymes involved in N assimilation from *B. juncea* and carried out their expression profiling under salt, osmotic, cold and heat stresses after 1h and 24h of treatment. Our results showed that expression of some key genes involved in N-uptake and assimilation was downregulated under abiotic stress conditions.

## Materials and Methods

### Plant material, growth conditions and stress treatments

Seeds of *B. juncea* cv. Varuna were kindly provided by Prof. Deepak Pental, Department of Genetics, Delhi University South Campus, New Delhi, India. Healthy seeds were surface sterilized with 70% ethanol for 2–3 minutes followed by repeated washing with autoclaved distilled water and allowed to germinate over sterile seed germination sheets in dark for 3 days and then transferred to light. The one week-old seedlings were transferred to ½ strength Murashige and Skoog medium (MS medium) [32] and acclimatized in control conditions for 3–4 hours. For stress imposition, the plants were treated with ½ strength MS medium supplemented with 150mM NaCl or 250mM mannitol or seedlings were exposed to 4°C or 42°C for 1hr and 24hr duration. Plants treated with ½ strength MS medium grown under control conditions were considered as untreated control. Each treatment had three replicates. Following stress

treatments, the plants were washed with distilled water; tissues were harvested, wrapped in aluminium foil, frozen in liquid nitrogen and then stored in  $-80^{\circ}\text{C}$  until future use.

## Cloning and sequence analysis

Out of various genes involved in N uptake and assimilation only one gene encoding for high-affinity nitrate transporter (Accession no. AEZ68614.1) of *B. juncea* was available in NCBI database as on July 31, 2014. Since whole genome of *B. juncea* has not been sequenced, coding DNA sequences of NRT1, NRT2, AMT, NR, NiR, GS, GOGAT, GDH and ASN of *Arabidopsis*, *B. napus* and *B. rapa* were downloaded from the *Arabidopsis* information resource (TAIR version 10) and NCBI database (<http://www.ncbi.nlm.nih.gov/>). Degenerate primers (S1 File) were designed to amplify full length coding sequences using cDNA of *B. juncea* cv. Varuna seedlings as a template. The PCR products were cloned in pGEMT Easy cloning vector (Promega) and confirmed by nucleotide sequencing. All the cloned cDNAs have been submitted to GenBank and the accession numbers have been shown in Table 1. The isolated sequences were BLAST searched against NCBI database in order to identify the homologous sequences. The nucleotide sequences were translated using ExPasy (<http://www.expasy.org/>). The molecular weight and isoelectric point of predicted proteins were obtained using Compute PI/MW tool of ExPasy. The sub-cellular localizations of translated proteins were predicted using WoLF-P-SORT program and Cell-PLoc 2.0 program [33–34]. Conserved domains in various proteins were identified using PFAM database (<http://pfam.xfam.org/>). The amino acid sequence similarity was also checked among the homologs using BLASTP. To perform phylogenetic analysis of protein sequences with *A. thaliana* orthologs, the amino acid sequences were aligned using clustalw and phylogenetic trees were made by neighbour-joining method with 1000 bootstrap replicates using MEGA6 software [35].

## RNA isolation and quantitative real-time PCR

Total RNA was extracted from all samples using iRIS method [36]. The concentration and quality of RNA were checked using NanoDrop 1000. The total RNA was treated with DNase I (Fermentas Life Sciences, USA) at  $37^{\circ}\text{C}$  for 30 minutes to degrade any DNA contamination in RNA sample. For cDNA synthesis,  $3\mu\text{g}$  of total RNA was reverse transcribed using Revert-Aid H Minus Reverse Transcriptase kit (Thermo Scientific, USA) in a final volume of  $20\mu\text{L}$  according to the manufacturer's instructions and cDNA was diluted 10 times in nuclease free water. The qRT-PCR analysis was performed using gene specific primers designed using PrimerExpress software version 3.0.1 (Applied Biosystems; S2 File). Proper amplification for *BjASN3* and *BjASN4* was not obtained, thus not included in expression analysis. The qRT-PCR reactions were performed on Step One real-time PCR machine (Applied Biosystems, USA). Each reaction contained  $2.5\mu\text{L}$  diluted cDNA,  $10\text{mM}$  each of gene specific forward and reverse primers and  $5\mu\text{L}$  of SYBR Green qPCR Master Mix (Applied Biosystems, USA) in a final volume of  $10\mu\text{L}$ . qRT-PCR was done in three technical and three biological replicates. The following thermal profile was used for PCR amplification:  $95^{\circ}\text{C}$  for 10 min followed by 40 cycles of  $95^{\circ}\text{C}$  for 15s and  $60^{\circ}\text{C}$  for 1 min. The specificity of reactions was checked by melting curve analysis. The *B. juncea* ubiquitin gene *UBQ9* was used as an internal control for normalization of relative mRNA abundance as suggested [37]. The qRT-PCR reactions were performed with three biological and three technical replicates. The relative expression ratios of target genes with respective controls were calculated using REST 2009 software (Qiagen).

**Table 1. List of proteins along with their molecular weight (M. wt.), isoelectric point (PI), CDS and protein length, subcellular localization and *Arabidopsis thaliana* orthologs.**

| Protein      | Accession numbers | M. wt. (KDa) | PI   | CDS length (bp) | Protein length (aa) | Subcellular localization | At ortholog locus ID | At protein description                          | Bit score |
|--------------|-------------------|--------------|------|-----------------|---------------------|--------------------------|----------------------|-------------------------------------------------|-----------|
| BjNRT1.1     | KT119578          | 64.97        | 8.57 | 1767            | 589                 | Plasma membrane          | AT1G12110            | nitrate transporter 1.1/ AtNPF6.3               | 1013      |
| BjNRT1.2     | KT119579          | 63.84        | 8.79 | 1743            | 581                 | Plasma membrane          | AT1G69850            | nitrate transporter 1:2/ AtNPF4.6               | 960       |
| BjNRT1.3     | KT119580          | 65.17        | 8.99 | 1764            | 588                 | Plasma membrane          | AT3G21670            | AtNPF6.4/ NRT1/PTR family 6.4                   | 928       |
| BjNRT1.4     | KT119581          | 63.43        | 8.78 | 1731            | 577                 | Plasma membrane          | AT2G26690            | AtNPF6.2/ NRT1/PTR family 6.2                   | 1003      |
| BjNRT1.5     | KT119582          | 69.49        | 5.7  | 1860            | 620                 | Plasma membrane          | AT1G32450            | AtNPF7.3/ nitrate transporter 1.5               | 1113      |
| BjNRT1.7     | KT119583          | 68.70        | 8.95 | 1866            | 622                 | Plasma membrane          | AT1G69870            | AtNPF2.13/ nitrate transporter 1.7              | 987       |
| BjNRT1.8     | KT119584          | 64.72        | 6.22 | 1749            | 583                 | Plasma membrane          | AT4G21680            | AtNPF7.2./nitrate transporter 1.8               | 1043      |
| BjNRT2.1     | KT119585          | 51.19        | 9.2  | 1407            | 469                 | Plasma membrane          | AT1G08090            | ACH1/nitrate transporter 2:1                    | 899       |
| BjNRT2.7     | KT119586          | 51.84        | 9.06 | 1455            | 485                 | Plasma membrane          | AT5G14570            | AtNRT2.7, high affinity nitrate transporter 2.7 | 647       |
| BjAMT1.1     | KT119596          | 53.64        | 7.11 | 1509            | 503                 | Endoplasmic reticulum    | AT4G13510            | ammonium transporter 1;1                        | 822       |
| BjAMT1.2     | KT119597          | 54.57        | 8.04 | 1530            | 510                 | Plasma membrane          | AT1G64780            | ammonium transporter 1;2                        | 823       |
| BjAMT2       | KT119598          | 52.532       | 7.12 | 1464            | 488                 | Plasma membrane          | AT2G38290            | ammonium transporter 2                          | 825       |
| BjNR1        | KT119587          | 102.25       | 6.6  | 2730            | 910                 | Chloroplast              | AT1G77760            | nitrate reductase 1                             | 1698      |
| BjNR2        | KT119588          | 102.41       | 6.23 | 2733            | 911                 | Cytoplasm                | AT1G77760            | nitrate reductase 1                             | 1675      |
| BjNiR        | KT119589          | 65.40        | 6.29 | 1755            | 585                 | Chloroplast              | AT2G15620            | nitrite reductase/NiR1                          | 1106      |
| BjGS1.1      | KT119590          | 39.163       | 5.28 | 1068            | 356                 | Cytoplasm                | AT5G37600            | glutamine synthase 1;1                          | 707       |
| BjGS1.3      | KT119591          | 38.59        | 6.4  | 1062            | 354                 | Cytoplasm                | AT3G17820            | glutamine synthase 1;3                          | 624       |
| BjGS2        | KT119593          | 47.37        | 5.84 | 1284            | 428                 | Chloroplast              | AT5G35630            | glutamine synthetase 2                          | 821       |
| BjFd-GOGAT   | KT119603          | 154.66       | 6.35 | 4806            | 1602                | Chloroplast              | AT5G04140            | ferredoxin-dependent glutamate synthase         | 3022      |
| BjNADH-GOGAT | KT119604          | 240.68       | 6.05 | 6597            | 2199                | Chloroplast              | AT5G53460            | nadh-dependent glutamate synthase 1             | 3979      |
| GDH1         | KT119594          | 44.61        | 6.23 | 1233            | 411                 | Chloroplast              | AT5G18170            | glutamate dehydrogenase 1                       | 814       |
| GDH2         | KT119595          | 35.13        | 5.78 | 984             | 328                 | Mitochondria             | AT5G07440            | glutamate dehydrogenase 2                       | 658       |
| ASN1         | KT119599          | 64.52        | 5.92 | 1722            | 574                 | Cytoplasm                | AT3G47340            | glutamine-dependent asparagine synthase 1       | 1076      |
| ASN2         | KT119600          | 63.86        | 5.98 | 1695            | 565                 | Cytoplasm                | AT5G65010            | asparagine synthetase 2                         | 1045      |
| ASN3         | KT119601          | 65.33        | 6.25 | 1740            | 580                 | Cytoplasm                | AT5G10240            | asparagine synthetase 3                         | 1024      |
| ASN4         | KT119602          | 42.38        | 6.98 | 1128            | 376                 | Chloroplast              | AT2G03667            | asparagine synthase family protein              | 674       |

doi:10.1371/journal.pone.0143645.t001

### Statistical analysis of the data

The genes were considered to be significantly up or down-regulated if the change in expression was  $\geq 2$  fold or  $<0.5$  fold and p-value  $<0.05$  (Student's t-test). The mean value of relative

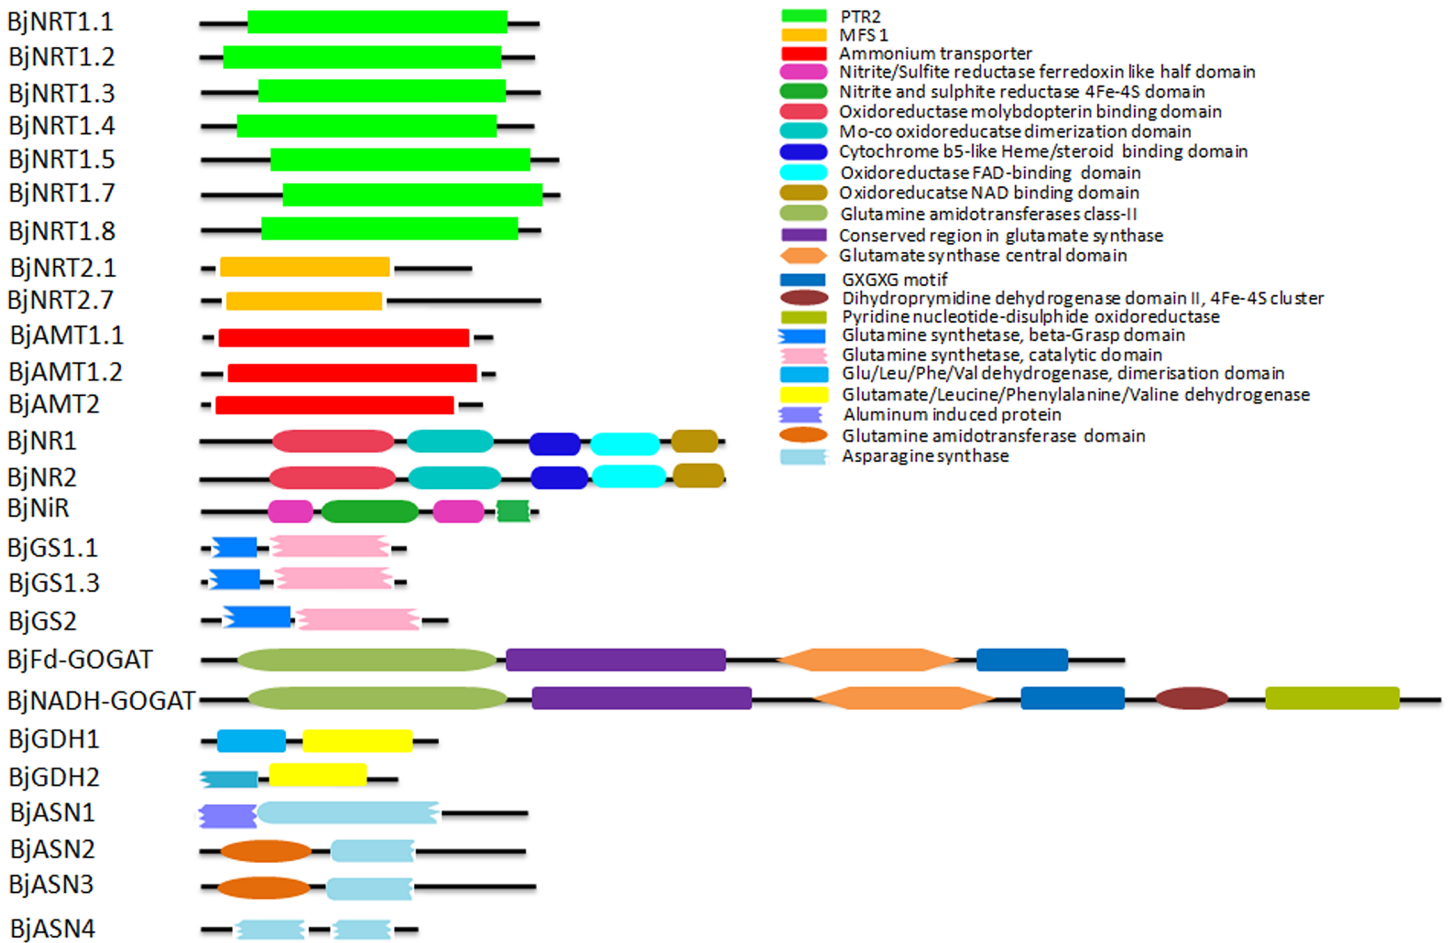

**Fig 2. The conserved domain architecture of various proteins involved in nitrate and ammonium uptake, nitrate reduction and ammonia assimilation in *B. juncea*.**

doi:10.1371/journal.pone.0143645.g002

expression with respect to control was used to plot figures and error bars represent standard error of three biological replicates. To identify statistical significance in the expression of genes between two time points, Student's t-test was used with p-value <0.05; p-value <0.001; p-value <0.0001.

## Results and Discussion

### Cloning of genes involved in nitrogen uptake and assimilation

Full-length CDSs of various genes amplified using cDNA prepared from total RNA isolated from seedlings of *B. juncea* cv. Varuna were cloned and their sequences confirmed through nucleotide sequencing. The sizes of predicted proteins ranged between 328–2199 amino acids. The molecular weight and PI of the predicted proteins ranged between 35.13 KDa–240.6 KDa and 5.28–9.2, respectively (Table 1). The conserved domain analysis revealed that all the NRT1 proteins contain a single proton-dependent oligopeptide transporter (PTR; PF00854) domain and NRT2 proteins contain major facilitator superfamily domain (MFS\_1; PF07690) domain (Fig 2). Members of the AMT family were found to contain a single ammonium transporter domain (PF00909). The NR proteins contain 5 major domains, namely Mo\_Co dimer (PF03404), Oxidored molyb (PF00174), FAD binding\_6 (PF00173), NAD binding\_1

(PF00970) and 1cyt\_b5 (PF00175). The NiR proteins contain two NIR\_SIR\_Ferr (PF03460) and NIR\_SIR domains (PF01077). The GS proteins contain two domains, Gln\_syn\_N (PF03951) and Gln\_syn\_C (PF00120). The Fd-GOGAT protein contains four domains GTase\_2 (PF00310), Glu\_syn\_central (PF04898), Glu\_synthase (PF01645) and GXGXG (PF01493) domain however NADH-GOGAT contain two additional domains Fer\_4\_20 (PF14691) and pyr\_redox\_2 (PF07992). The GDH proteins contain two domains, namely ELFV\_dehydrog\_N (PF02812), ELFV\_dehydrog (PF00208). The ASN1 protein contains two domains, namely DUF3700 (PF12481) and Asn\_synthase (PF00733), while ASN2, ASN3 and ASN4 proteins contain GATase\_7 (PF13537) and Asn\_synthase domain (PF00733). To determine the phylogenetic relationship of *B. juncea* proteins with that of their *A. thaliana* orthologs, phylogenetic trees were made (S1 Fig). The *B. juncea* proteins and their respective *Arabidopsis* orthologs were found to be clustered together.

The prediction of subcellular localization has shown that most of the proteins were predicted to be localized in the organelles of their site of action (Table 1). For e.g., all the BjNRT1 and BjNRT2 transporters were predicted to be localized in plasma membrane. The BjAMT1.2 and BjAMT2 transporters were also predicted to be localized in the plasma membrane, while BjAMT1.1 was predicted to be localized in endoplasmic reticulum (ER). Similarly in wild grass *Puccinellia tenuiflora*, PtAMT1.1 was also shown to be localized in endomembrane [38]. The BjNR and BjNiR were found to be localized in cytoplasm and chloroplast, respectively where actual processes of nitrate and nitrite reduction takes place [39]. The two isoforms of glutamine synthetase, BjGS1 and BjGS2 involved in ammonia assimilation were predicted to be localized in cytoplasm and chloroplast [40]. The BjFd-GOGAT and BjNADH-GOGAT both were predicted to be localized in chloroplast, the main organelle where GS/GOGAT cycle takes place [41]. The BjGDH1 and BjGDH2 were predicted to be localized in chloroplast and mitochondria, respectively. Similarly, GDH1 in *Chlorella* and GDH2 in *Vitis vinifera* were found to be localized in chloroplast and mitochondria, respectively [42,43]. The BjASN1, BjASN2 and BjASN3 proteins involved in asparagine synthesis were predicted to be localized in cytosol [44]. Whereas, BjASN4 was found to be localized in chloroplast.

## Effect of abiotic stresses on expression of genes encoding transporters

In plants, short term and long term exposure to stress leads to change in gene expression for cellular adaptation to changing environment [45]. In present study, expression of all the genes involved in N uptake and assimilation was studied following 1h and 24h of abiotic stress exposure. The change in gene expression after 1h provides insights into the plant acclimation to an early stress and can be considered as a general response to stress conditions. Whereas, transcriptional changes have been found to become more specific to abiotic stress after prolonged stress exposure [46]. Therefore, expression changes after 24h may reveal genes that are more specific to abiotic stress under longer duration.

**Nitrate transporters.** The first step of NO<sub>3</sub> assimilation is its uptake with the help of nitrate transporters located on the plasma membrane of the root epidermal and cortical cells. In higher plants, two types of nitrate transporters have been found, low affinity nitrate transporters (NRT1) and high affinity nitrate transporters (NRT2). The amino acid sequence identity among seven NRT1 homologs ranges between 30.1–68.3%, while two NRT2 homologs share 46% sequence identity (S3 File). Expression analysis of 7 genes encoding NRT1 (*BjNRT1.1*, *BjNRT1.2*, *BjNRT1.3*, *BjNRT1.4*, *BjNRT1.5*, *BjNRT1.7*, *BjNRT1.8*) and 2 genes encoding NRT2 (*BjNRT2.1*, *BjNRT2.7*) was carried out under various abiotic stresses (Fig 3A, S2 Fig). The expression of *BjNRT1.1* and *BjNRT1.5* was found to be upregulated after 1h of all the stress treatments, while their expression was either downregulated or remained unaltered

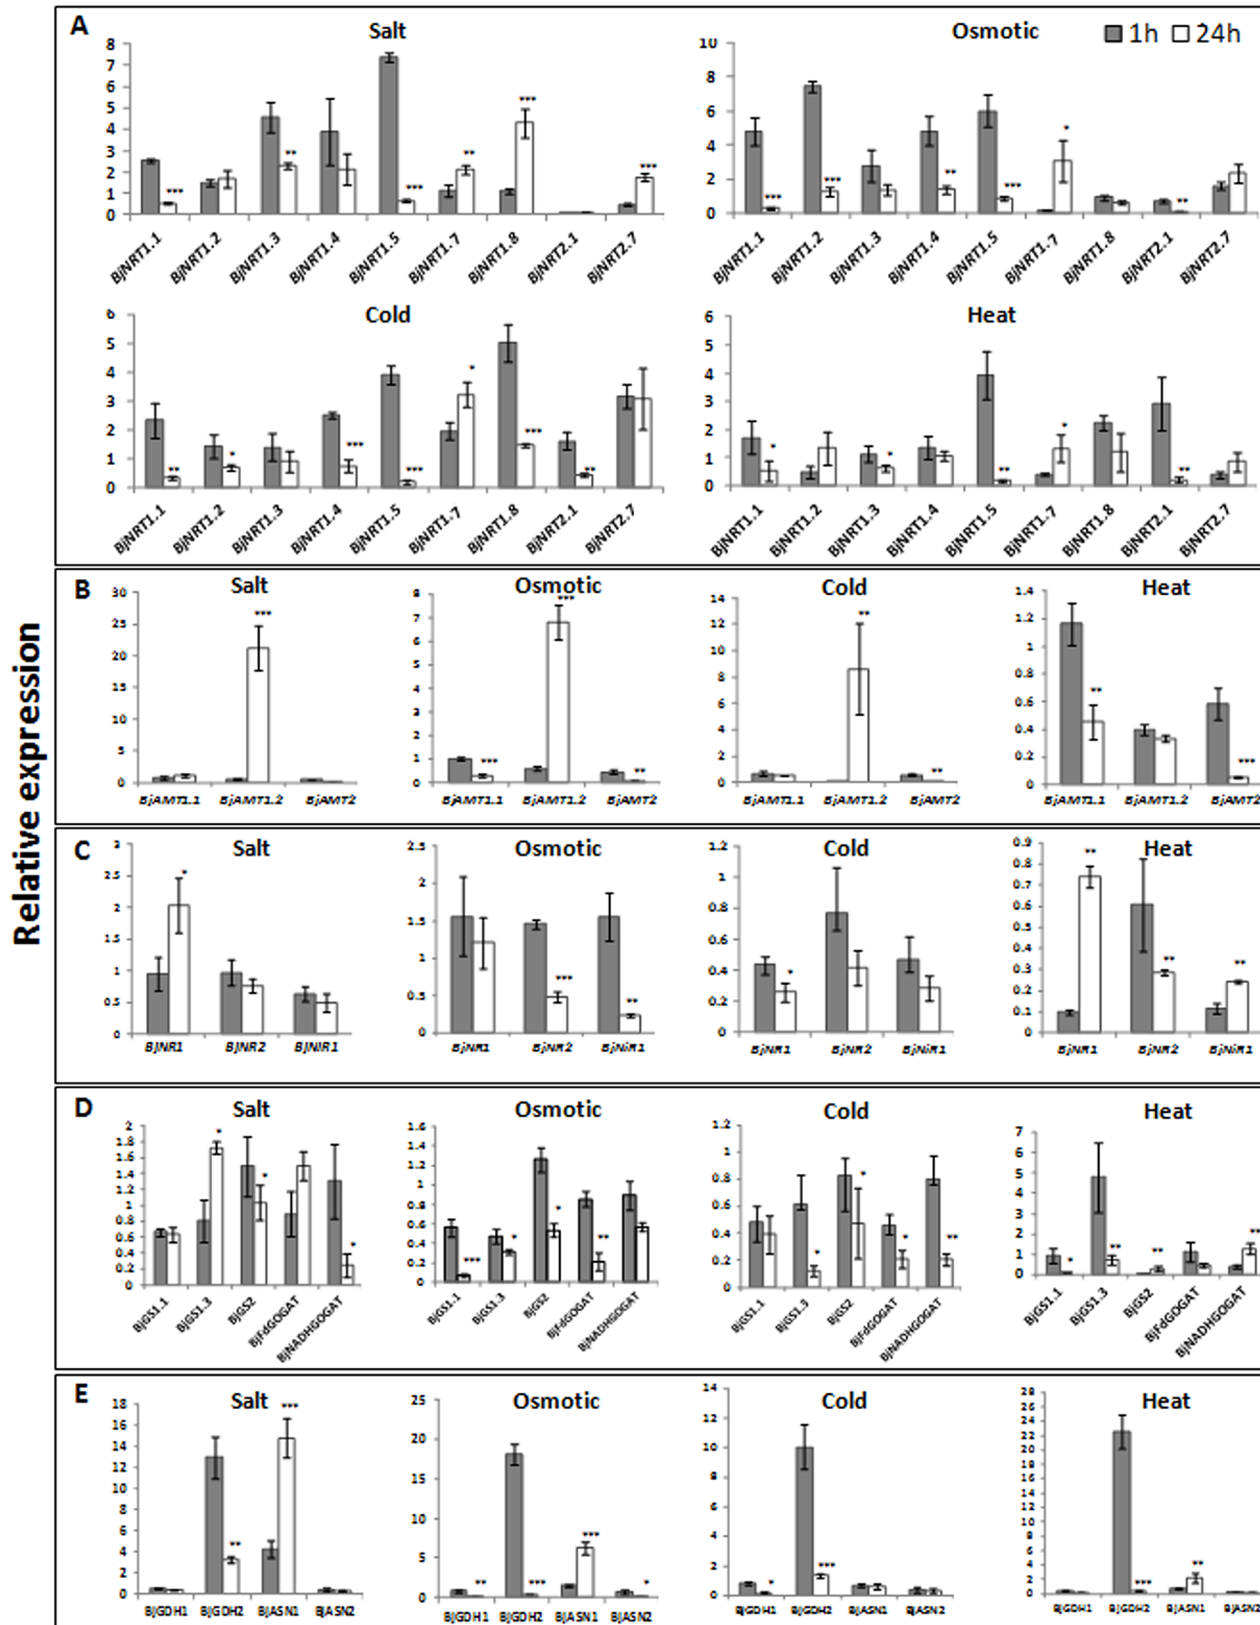



**Fig 3. Bar diagrams showing relative expression of various genes encoding (A) nitrate and (B) ammonium transporters and enzymes involved in (C) nitrate and nitrite reduction and (D,E) ammonium assimilation in *B. juncea* under abiotic stress conditions after 1h (grey bars) and 24h (white bars) as compared to untreated control plants.** Relative expression ratios were determined using qRT-PCR. Asterisks on the top of the bars indicate statistically significant differences (\* p-value<0.05 (significant), \*\*p-value < .01 (highly significant), \*\*\*p < .001 (very highly significant) between 1h and 24h stress treated samples.

doi:10.1371/journal.pone.0143645.g003

under 24h of the treatments. In *Arabidopsis*, CHL1 (*AtNTR1.1*) was shown to function as dual-affinity nitrate transporter contributing to both low and high affinity nitrate uptake in *Arabidopsis* roots [47], while NRT1.5 is mainly involved in long distance transport of nitrate from root to shoot [48]. In plants, early response to environmental stresses is critical to ensure cell survival. Therefore, initial upregulation of these genes might reflect their importance in plant adaptation to various stresses. In plants, root is the first tissue to perceive stress signal and repression in lateral root number and growth has been well established as an adaptive response under stress conditions, like salt and drought [49,50]. In *Arabidopsis*, NRT1.1 was found to accelerate lateral root growth in nitrate rich patches of external medium by accumulating auxin in the lateral root tip [51]. The downregulation of *BjNRT1.1* after 24h of stress exposure might participate in altering root morphology that may in turn help plant to withstand stress conditions. In normal conditions, majority of the nitrate is transported from root to shoot for assimilation process but under stress conditions the reallocation of nitrate to root was observed [52,53]. In *A. thaliana*, this reallocation due to downregulation of *AtNRT1.5* has been found to be involved in stress tolerance mechanism [54–55]. In present study, the downregulation of *BjNRT1.5* after 24h suggests its involvement in plant tolerance mechanism to abiotic stresses. The expression of *BjNRT1.2* was downregulated at 24h of cold and 1h of heat stress treatments, while it remained unaltered under rest of the conditions. In Poplar, differential expression of NRT1 and NRT2 genes in response to phytohormones and ion stress has been correlated with difference in *cis*-regulatory elements in their promoter regions [56]. The expression of *BjNRT1.3* was upregulated under salt stress (1h, 24h) and under osmotic (1h) treatment, while under rest of the conditions, its expression remained unchanged. In rice, expression of *OsNRT1.3* gene was upregulated under drought, while treatment with ABA and NaCl did not affect its expression [57]. The expression of *BjNRT1.4* was upregulated under salt (1h, 24h), osmotic (1h) and cold (1h) stresses, while it was found to be downregulated under cold (24h) and remained unchanged under rest of the conditions. The *BjNRT1.7* was found to be the only gene, expression of which was upregulated after 24h of all the stress treatments. The expression of *BjNRT1.8* was upregulated under salt (24h), cold (1h) and heat (1h) stresses, while in rest of the conditions, its expression was either downregulated or remained unaltered. The expression of *AtNRT1.8* was found to be strongly upregulated in *Arabidopsis* roots under cadmium stress [55]. The expression of *BjNRT2.1* was downregulated under all the stress conditions, except cold (1h) where it was unaltered and under heat (1h) where it was upregulated. The downregulation of *BjNRT2.1*, which is a member of high affinity nitrate transporter (HATS) family, may be due to the fact that all the stress treatments were given in ½ strength MS medium, where nitrate concentration is 19.7mM. It is well known that members of HATS play role in nitrate uptake when external nitrate concentration is very low (<250µM) [58]. Exposure to stress may further lead to downregulation of *BjNRT2.1*. Downregulation of *AtNRT2.1* gene under salt stress was also reported in tomato [49]. In *Arabidopsis*, *AtNRT2.1* was shown as an important component of inducible high-affinity nitrate transport system (IHATS) and its disruption in *Atnrt2.1* mutant led to 72% reduction in IHATS [59]. These observations suggest that downregulation of two important nitrate transporter genes, *BjNRT1.1* and *BjNRT2.1* under abiotic stress conditions disrupts both low- and high-affinity nitrate transport systems, which may be

one of the key factors, inhibiting growth and development of *B. juncea* under abiotic stress conditions.

**Ammonium transporters.** In most of the natural environmental conditions, ammonium and nitrate are considered to be the main source of nitrogen for the plants growth. Uptake of ammonium ions by plants is more rapid process over nitrate ions when both of these are provided with equal concentration [60]. The BjAMT1.1 and BjAMT1.2 share 94% percent amino acid sequence identity (S3 File). Expression of two *AMT1* genes and one *AMT2* gene was studied under abiotic stress conditions. Expression of *BjAMT1.2* was found to be downregulated under 1h of salt, osmotic and cold stresses, while under 24h treatment of these stresses induced its expression (Fig 3B, S2 Fig). Under heat stresses, expression of *BjAMT1.2* was found to be downregulated at both the time points (1h and 24h). The expression of *BjAMT1.1* was downregulated under all the treatments, except salt (24h), osmotic (1h) and heat (1h), where it remained unaltered. The expression of *BjAMT2* was found to be downregulated under all the stress conditions. Transcriptomics study of *Lotus japonicus* has revealed the downregulation of *AMT1* gene under drought stress [61]. In plants uptake of ammonium ion is energetically less expensive process as plants do not have to spend extra energy for reducing nitrate into ammonium. Our result suggested that both, nitrate and ammonium uptake are inhibited under stress conditions.

### Effect of abiotic stresses on expression of genes encoding enzymes involved in N assimilation

**Nitrate and Nitrite reductases.** Once the nitrate enters into the cytoplasm, it is reduced to nitrite with the help of nitrate reductase (NR). The nitrite is then transported into chloroplast and reduced into ammonium ion with the help of nitrite reductase (NiR). These enzymes have been shown to be highly regulated at transcriptional and translational level and also influenced by environmental factors [62]. The BjNR1 and BjNR2 were found to share 91% amino acid sequence identity (S3 File). The expression of *BjNR1* was found to be upregulated only under salt stress at 24h (Fig 3C, S2 Fig). In all other conditions, expression of *BjNR1* was found to be downregulated. Expression of *BjNR2* was found to be downregulated under all the stresses at 24h except, salt stress, while it remained unchanged under all the stresses at 1h. Similarly, expression of *BjNiR1* was downregulated under all the stress conditions, except osmotic stress at 1h (Fig 3C, S2 Fig). As expression of nitrate assimilation genes is controlled by nitrate content in plants [63], a severe downregulation of *BjNR2* and *BjNiR1* can be correlated with reduction in nitrate transport by roots under stress conditions. Reduced NR activity under salinity stress was reported in several plants, like barley, maize and tomato [64–66]. The reduction in NR activity under salt stress may be either due to direct effect of  $\text{Cl}^-$  ions in the external medium causing reduction in nitrate uptake or may be due to low content of NR protein [67–69]. However increased expression of NR2 gene was reported in *Arabidopsis* roots during first week when treated with 100mM NaCl [70]. In leaves of winter wheat, activation of NR under short term low temperature stress was observed [71]. Repression of nitrate and nitrite reductase activity under osmotic and heat stress was also reported [72,73].

**Glutamine synthetase and glutamate synthase.** Glutamine synthetase (GS) is an ATP dependent enzyme that fixes the ammonium into glutamate to form glutamine. In plants, generally two types of GS proteins are present, GS1 and GS2 which are cytoplasmic and chloroplastic, respectively. The BjGS1.1 and BjGS1.3 were found to share 86.12% sequence identity at amino acid level (S3 File). Expression of *BjGS1.1*, *BjGS1.3* and *BjGS2* was studied under abiotic stresses (Fig 3D, S2 Fig). Expression of *BjGS1.1* was found to be downregulated under all the stress conditions. Similarly, expression of *BjGS1.3* was also found to be downregulated under

all the stress conditions, except 1h of heat stress, where it was strongly upregulated. Expression of *BjGS2* was also downregulated under all the stress conditions, except salt (1h, 24h) and osmotic (1h) stress. The GS activity and its transcript accumulation was found to be affected by salt stress in an organ dependent manner, with increased ammonia assimilation in roots and decreased assimilation in leaves of potato plants [74]. Reduction in GS activity was already reported in tea bud under cold, drought and heat stresses [75]. Under stress conditions, deviation of glutamate from GS/GOGAT cycle to the synthesis of organic osmoticum has been observed [76]. Therefore reduction in the expression of glutamine synthetase gene under most of the stress might be due to low availability of glutamate. Reduced expression of GS gene may slow down process of ammonia assimilation and thus affects nitrogen metabolism. This suggested that abiotic stress severely affected the process of ammonia assimilation in *B. juncea*.

In plants, glutamate synthase mainly occurs in two forms, Fd-GOGAT and NADH-GOGAT. This enzyme catalyzes the transfer of the amide nitrogen of glutamine to 2-oxoglutarate to form two molecules of glutamate. In present study, *BjFd-GOGAT* and *BjNADH-GOGAT* were found to share 44% sequence identity at amino acid level (S3 File). The expression of *BjFd-GOGAT* was found to be downregulated after 24h of osmotic, cold and heat stress, whereas expression of *BjNADH-GOGAT* was downregulated after 24h of salt, osmotic and cold stress (Fig 3D, S1 Fig). In nodules of *Vicia faba*, activity of NADH-GOGAT was found to be decreased more than that of GS under 100mM NaCl stress [77,78]. The activity of GOGAT was also strongly inhibited in *Cicer arietinum* under 100 mM salt stress [79].

**Glutamate dehydrogenase.** Glutamate dehydrogenase enzyme catalyzes the reversible reaction involving assimilation of ammonia into glutamate and deamination of glutamate to form 2-oxoglutarate and ammonium. In plants, two types of GDH have been found, depending on the cofactor viz. NAD(H) dependent (mitochondrial) and NADP(H) dependent (chloroplast). Glutamate dehydrogenase is considered as an alternative enzyme for GS/GOGAT cycle under abiotic stresses [80]. Moreover, both aminating and deaminating properties of GDH were found to be helpful for plant during stress condition, as amination leads to detoxification of excess ammonium ions accumulated during stress [81] and deamination activity provides intermediate to the TCA cycle and thus sustained carbohydrate metabolism [82]. The expression of *BjGDH1* was downregulated under all the stress conditions, except 24h of cold stress, (Fig 3E, S2 Fig). The percent identity between *BjGDH1* and *BjGDH2* was found to be 76% (S3 File). However, expression of *BjGDH2* gene displayed a strong upregulation under both, 1h and 24h of salt stress, while under osmotic, cold and heat stresses, its expression was upregulated only at 1h time point. The GDH activity was found to be increased in salt tolerant rice cultivar in response to high NaCl concentration upto 800mM as compared to salt sensitive cultivar [82]. Increased expression of *GDH* under stress condition was also reported in tobacco [83]. Expression of *BjGDH2* was downregulated under 24h of osmotic and heat stress and returned to basal level at 24h of cold stress. An early upregulation of *BjGDH2* gene may have protective role in adjusting *B. juncea* plant under initial exposure to stress condition.

**Asparagine synthetase.** Asparagine synthetase (ASN) is an ATP-dependent enzyme that catalyses the transfer of the amide amino group of glutamine to a molecule of aspartate to generate glutamate and asparagine [84]. Increased asparagine level was reported under water deprivation and salinity stress conditions [85,86]. The accumulation of asparagine under stress is may be either due to increase in its biosynthesis or may be due to degradation of proteins. However, in *Coleus blumei*, <sup>14</sup>C labeling experiment has suggested involvement of *de novo* synthesis in accumulation of free asparagines under salinity stress [86]. The sequence identity among ASN homologs ranged between 76–90.79% at amino acid level (S3 File). Expression of two genes encoding ASN was studied under different stresses, which revealed that expression of *BjASN1* was upregulated under salt (1h, 24h), osmotic (24h) and heat (24h) stresses, while it

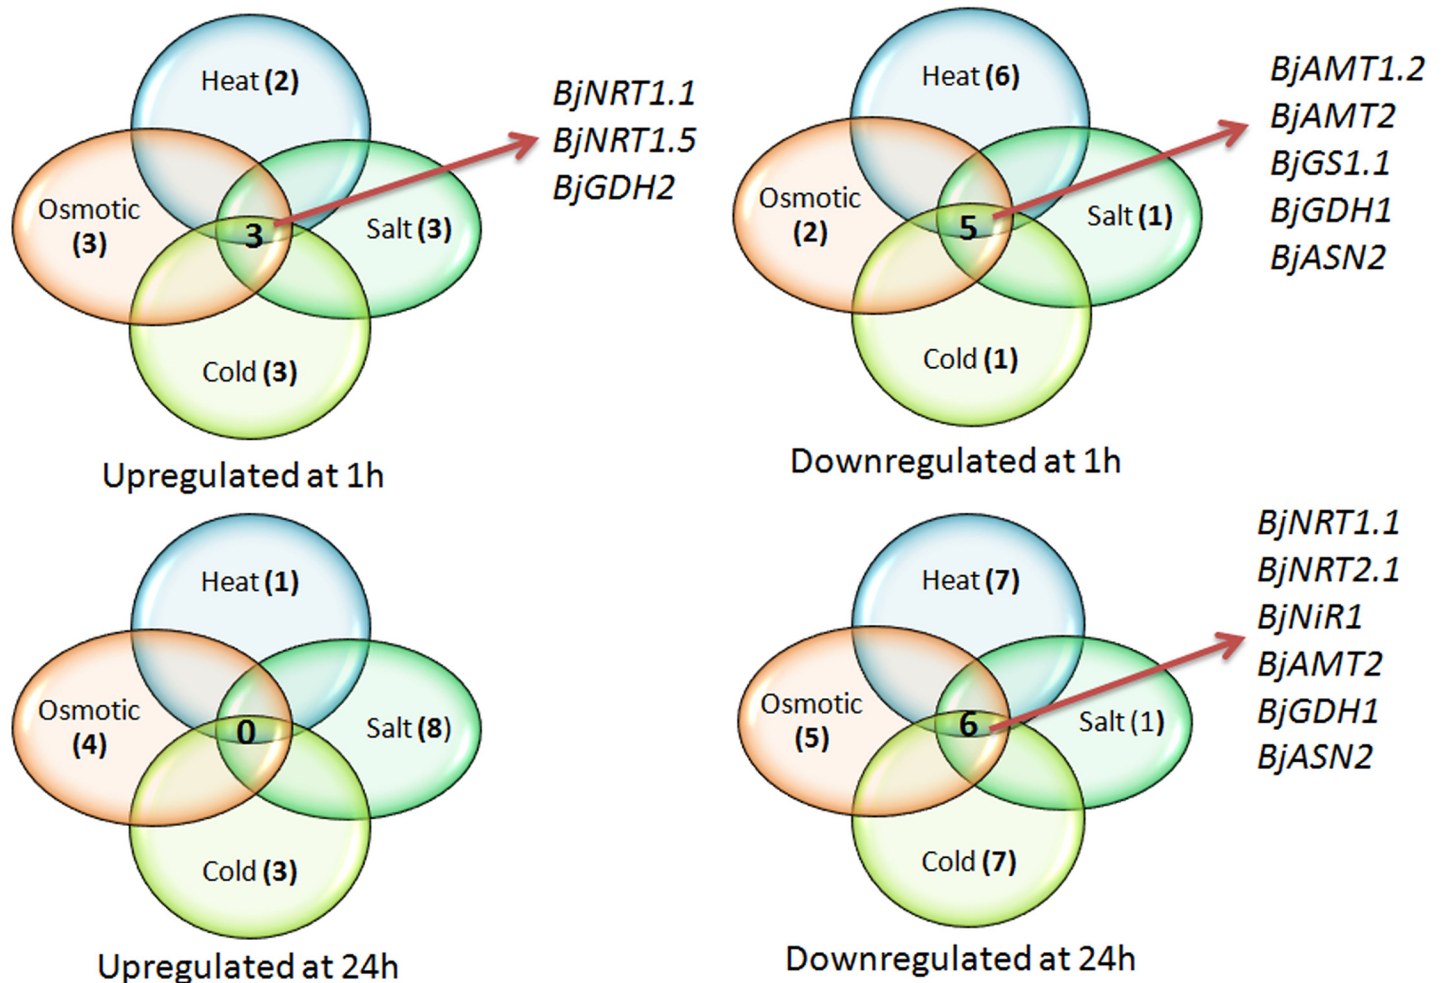

**Fig 4. Venn diagram showing genes commonly upregulated and downregulated after 1h and 24h of stress treatments.**

doi:10.1371/journal.pone.0143645.g004

was and downregulated under cold (1h, 24h) and heat (1h) stresses (Fig 3E, S2 Fig). However, expression of *BjASN2* was found to be downregulated under all the stress conditions. Increased expression of *BjASN1* gene may lead to increased accumulation of asparagine under stress conditions. Under abiotic stress conditions, expression of *ASN1* was also reported to be induced in wheat seedlings, maize and sunflower [87–89].

## Conclusions

Abiotic stresses affect virtually all aspects of plant life, including nitrogen metabolism. However in case of *B. juncea*, effect of abiotic stress on nitrogen metabolism has been studied only at enzymatic level, so far. The present work represents the first report where effect of various abiotic stresses on expression of all the genes involved in Nitrogen transport, its reduction and its assimilation has been shown in any plant species. In order to understand the interaction of N pathway with abiotic stresses, expression profiling of N pathway genes was carried out under salt, osmotic, cold and heat stresses. We have cloned twenty six genes encoding various transporters involved in N uptake (NRT and AMT) and various enzymes involved in N assimilation (NR, NiR, GS, GOGAT, GDH and ASN) in *B. juncea*. Detailed expression profiling revealed

that expression of various N pathway genes was modulated at different time points under various abiotic stress conditions. Differential expression pattern of genes, which encode for proteins involved in similar function may be due to the difference in regulatory motifs in their promoter regions. After 1h of stress treatments, three genes (*BjNRT1.1*, *BjNRT1.5* and *BjGDH2*) were found to be upregulated, whereas five genes (*BjAMT1.2*, *BjAMT2*, *BjGS1.1*, *BjGDH1*, and *BjASN2*) were found to be downregulated under all the stresses, commonly (Fig 4). However after 24h of stress treatments, no gene was found to be commonly upregulated, while expression of six genes (*BjNRT1.1*, *BjNRT2.1*, *BjAMT2*, *BjNiR1*, *BjGDH1* and *BjASN2*) was found to be commonly downregulated. Taken together, this analysis revealed that downregulation of *BjNRT1.1* and *BjNRT1.5*, which are considered important for nitrate uptake and translocation from root to shoot, respectively may lead to reduction in nitrate content in plant tissues. The reduced nitrate content in plant tissues may lead to downregulation of gene involved in N assimilation under stress conditions. Therefore, our analysis showed that longer exposure of abiotic stresses adversely affect all the processes of N pathway viz. N uptake, assimilation and mobilization in *B. juncea*. This may be one of the key components, which reduce plant growth and productivity under abiotic stresses. In conclusion, the present study provides an insight of regulation of various processes of genes of N pathway under abiotic stresses, which may help in selecting some of the genes of N uptake and assimilation pathway to develop transgenic plants with optimum yield potential under abiotic stress conditions.

## Supporting Information

### **S1 Fig. Phylogenetic analyses of *B. juncea* protein sequences with *A. thaliana* orthologs.**

Phylogenetic trees of NRT1 (A), NRT2 (B), AMT (C), NR (D), NiR (E), GS (F), GOGAT (G), GDH (H) and ASN (I) protein sequences with respective *A. thaliana* orthologs were made using neighbour-joining method with 1000 bootstrap replicates.  
(DOCX)

### **S2 Fig. Heat Map showing relative expression of various genes encoding nitrate and ammonium transporters and enzymes involved in nitrogen assimilation in *B. juncea* under abiotic stress conditions after 1h (A) and 24h (B) as compared to untreated control plants.**

Relative expression ratios were determined using qRT-PCR. Bar at the bottom indicates relative expression ratios.  
(DOCX)

### **S1 File. List of primers used for amplification of genes.**

(XLSX)

### **S2 File. List of primers used for qRT-PCR analysis and their amplicon size.**

(XLSX)

### **S3 File. Percent sequence identity among homologs of *Brassica juncea* proteins.**

(XLSX)

## Acknowledgments

Authors thank Director CSIR-Institute of Himalayan Bioresource Technology, Palampur for constant support and encouragement. Authors thank Prof. Deepak Pental, Department of Genetics, Delhi University South Campus, New Delhi, India for providing seeds of *B. juncea* cv. Varuna. This manuscript represents CSIR-IHBT communication no. 3901.

## Author Contributions

Conceived and designed the experiments: AKS. Performed the experiments: PG. Analyzed the data: PG AKS. Contributed reagents/materials/analysis tools: AKS. Wrote the paper: PG AKS.

## References

1. Silveira JAG, Cardoso BB, Melo ARB, Viegas RA. Salt-induced decrease in nitrate uptake and assimilation in cowpea plants. *Braz J Plant Physiol.* 1999; 11: 77–82.
2. Huez-Lopez MA, Ulery AL, Samani Z, Picchioni G, Flynn RP. Response of chile pepper (*Capsicum annuum* L.) to salt stress and organic and inorganic nitrogen sources: I. growth and yield. *Trop Subtrop Agroecosyst.* 2011; 14: 137–147.
3. Cramer GR, Lauchli A, Epstein E. Effects of NaCl and CaCl<sub>2</sub> anion activities in complex nutrient solutions and root growth of cotton. *Plant Physiol.* 1986; 81: 792–797. PMID: [16664904](#)
4. Khan MG, Srivastava HS. Changes in growth and nitrogen assimilation in maize plants induced by NaCl and growth regulators. *Biol Plant.* 1998; 41: 93–99.
5. Chakrabarti N, Mukherjee S. Effect of phytohormones pre-treatment on nitrogen metabolism in *Vigna radiata* under salt stress. *Biol Plant.* 2003; 36: 63–66.
6. Debouba M, Gouia H, Suzuki A, Ghorbel MH. NaCl stress effects on enzymes involved in nitrogen assimilation pathway in tomato *Lycopersicon esculentum* seedlings. *J Plant Physiol.* 2006; 163: 1247–1258. PMID: [17126728](#)
7. Debouba M, Maaroufi-Dghimi H, Suzuki A, Ghorbel MH, Gouia H. Changes in growth and activity of enzymes involved in nitrate reduction and ammonium assimilation in tomato seedlings in response to NaCl Stress. *Ann Bot.* 2007; 99: 1143–1151. PMID: [17449498](#)
8. Robredo A, Perez-Lopez U, Miranda-Apodaca J, Lacuesta M, Mena-Petite A, Munoz-Rueda A. Elevated CO<sub>2</sub> reduces the drought effect on nitrogen metabolism in barley plants during drought and subsequent recovery. *J Exp Bot.* 2011; 71: 399–408.
9. Kirda C, Derici MR, Schepers JS. Yield response and N-fertilizer recovery of rained wheat growing in the Mediterranean region. *Field Crop Res.* 2001; 71: 113–122.
10. Rachmilevitch S, Huang B, Lambers H. Assimilation and allocation of carbon and nitrogen of thermal and nonthermal *Agrostis* species in response to high soil temperature. *New Phytol.* 2006; 170: 479–490. PMID: [16626470](#)
11. Ercoli L, Arduini I, Mariotti M, Masoni A. Post-anthesis dry matter and nitrogen dynamics in durum wheat as affected by nitrogen and temperature during grain filling. *Cereal Res Commun.* 2010; 38: 294–303.
12. Tahir ISA, Nakata N. Remobilization of nitrogen and carbohydrate from stems of bread wheat in response to heat stress during grain filling. *J Agro Crop Sci.* 2005; 191: 106–115.
13. Ito S, Hara T, Kawanami Y, Watanabe T, Thiraporn K, Ohtake N, et al. Carbon and nitrogen transport during grain filling in rice under high-temperature conditions. *J Agro Crop Sci.* 2009; 5: 368–376.
14. Nathawat NS, Kuhad MS, Goswami CL, Patel A, Kumar R. Nitrogen metabolism enzymes: effect of nitrogen sources and saline irrigation. *J Plant Nutr.* 2005; 28: 1089–1101.
15. Siddiqui MH, Mohammad F, Khan MN. Morphological and physio-biochemical characterization of *Brassica juncea* L. Czern. & Coss. genotypes under salt stress. *J Plant Interact.* 2009; 4: 67–80.
16. Ahmad P, Hakeem KUR, Kumar A, Ashraf M, Akram NA. Salt-induced changes in photosynthetic activity and oxidative defense system of three cultivars of mustard (*Brassica juncea* L.). *Afr J Biotechnol.* 2012; 11: 2694–2703.
17. Chauhan JS, Meena ML, Saini MK, Meena DR. Heat stress effects on morpho-physiological characters of Indian mustard (*Brassica juncea* L.). In: 16th Australian Research Assembly on Brassicas, Ballarat Victoria; 2009. pp. 91–97.
18. Rao GU, Jain A, Shivanna KT. Effect of high temperature stress on Brassica pollen: viability, germination and ability to set fruits and seeds. *Ann Bot.* 1992; 69: 193–198.
19. Angadi SV, Cutforth HW, Miller PR, McConkey BG, Entz MH, Brandt SA et al. Response of three *Brassica* species to high temperature stress during reproductive growth. *Can J Plant Sci.* 2000; 80: 693–701.20.
20. Hayat S, Masood A, Yusuf M, Fariduddin Q, Ahmad A. Growth of Indian mustard (*Brassica juncea* L.) in response to salicylic acid under high-temperature stress. *Braz J Plant Physiol.* 2009; 21: 187–195.

21. Gunasekara CP, Martin LD, French RJ, Siddique KHM, Walton G. Genotype by environment interactions of Indian mustard (*Brassica juncea* L.) and canola (*Brassica napus* L.) in Mediterranean-type environments: I. Crop growth and seed yield. *Euro J Agron*. 2006; 25: 1–12.
22. Singh M, Chauhan JS, Meena SS. Drought induce changes in water use efficiency and other morpho-physiological characters in Indian mustard (*Brassica juncea* L.). In: 16th Australian Research Assembly on Brassicas, Ballarat Victoria; 2009. pp. 1–5.
23. Chauhan JS, Tyagi MK, Kumar A, Nashaat NI, Singh M, Singh NB et al. Drought effects on yield and its components in Indian mustard (*Brassica juncea* L.). *Plant Breeding*. 2007; 126: 399–402.
24. Ferrario-Mery S, Valadier MH, Foyer CH. Overexpression of nitrate reductase in tobacco delays drought-induced decreases in nitrate reductase activity and mRNA. *Plant Physiol*. 1998; 117: 293–302. PMID: [9576799](#)
25. Hoshida H, Tanaka Y, Hibino T, Hayashi Y, Tanaka A, Takabe T et al. Enhanced tolerance to salt stress in transgenic rice that overexpresses chloroplast glutamine synthetase. *Plant Mol Biol*. 2000; 43: 103–111. PMID: [10949377](#)
26. El-Khatib RT, Hamerlync EP, Gallardo F, Kirby EG. Transgenic poplar characterized by ectopic expression of a pine cytosolic glutamine synthetase gene exhibits enhanced tolerance to water stress. *Tree Physiol*. 2004; 24: 729–736. PMID: [15123444](#)
27. Cai H, Zhou Y, Xiao J, Li X, Zhang Q, Lian X. Overexpressed glutamine synthetase gene modifies nitrogen metabolism and abiotic stress responses in rice. *Plant Cell Rep*. 2009; 28: 527–537. doi: [10.1007/s00299-008-0665-z](#) PMID: [19123004](#)
28. Lee HJ, Abdula SE, Jang DW, Park SH, Yoon UH, Jung YJ et al. Overexpression of the glutamine synthetase gene modulates oxidative stress response in rice after exposure to cadmium stress. *Plant Cell Rep*. 2013; 32: 1521–1529. doi: [10.1007/s00299-013-1464-8](#) PMID: [23743654](#)
29. Mungur R, Glass AD, Goodnow DB, Lightfoot DA. Metabolite fingerprinting in transgenic *Nicotiana tabacum* altered by *Escherichia coli* glutamate dehydrogenase gene. *J Biomed Biotechnol*. 2005; 2: 198–214.
30. Mungur R, Wood AJ, Lightfoot DA. Water potential is maintained during water deficit in *Nicotiana tabacum* expressing *Escherichia coli* glutamate dehydrogenase gene. *Plant Growth Reg*. 2006; 50: 231–238.
31. Lightfoot DA, Mungur R, Ameziane R, Nolte S, Long L, Bernhard K, et al. Improved drought tolerance of transgenic *Zea mays* plants that express the glutamate dehydrogenase gene (gdhA) of *E. coli*. *Euphytica* 2007; 156: 103–116.
32. Murashige T, Skoog F. A revised medium for rapid growth and bioassays with tobacco tissue cultures. *Physiol Plant*. 1962; 15: 473–497.
33. Horton P, Park KJ, Obyashi T, Fujita N, Harada H, Nakai K. WoLF PSORT protein localization predictor. *Nucleic Acids Res*. 2007; 35: W585–W587. PMID: [17517783](#)
34. Chou K, Shen H. Cell-PLOC 2.0: an improved package of web-servers for predicting subcellular localization of proteins in various organisms. *Nat Protoc*. 2010; 2: 1090–1103.
35. Tamura K, Stecher G, Peterson D, Filipinski A, Kumar S. MEGA6: Molecular evolutionary genetics analysis version 6.0. *Mol Biol Evol*. 2013; 30: 2725–2729. doi: [10.1093/molbev/mst197](#) PMID: [24132122](#)
36. Ghawana S, Paul A, Kumar H, Kumar A, Singh H, Bhardwaj PK, et al. An RNA isolation system for plant tissues rich in secondary metabolites. *BMC Res Notes*. 2011; 4: 85. doi: [10.1186/1756-0500-4-85](#) PMID: [21443767](#)
37. Chandna R, Augustine R, Bisht NC. Evaluation of candidate reference genes for gene expression normalization in *Brassica juncea* using real time quantitative RT-PCR. *PLoS One*. 2012; 7: e36918. doi: [10.1371/journal.pone.0036918](#) PMID: [22606308](#)
38. Bu Y, Sun B, Zhou A, Zhang X, Lee I, Liu S. Identification and characterization of a PutAMT1;1 gene from *Piccinellia tenuiflora*. *PLoS One*. 2013; 8: e83111. doi: [10.1371/journal.pone.0083111](#) PMID: [24340088](#)
39. Dalling MJ, Tolbert NE, Hageman RH. Intracellular location of nitrate reductase and nitrite reductase. I. Spinach and tobacco leaves. *Biochim Biophys Acta*. 1972; 283: 505–512. PMID: [4649359](#)
40. Lea PJ, Robinson SA, Stewart GR. The enzymology and metabolism of glutamine, glutamate and asparagine. In: Mifflin BJ, Lea PJ, editors. *Biochemistry of Plants: a comprehensive treatise*. Academic Press, New York; 1990. Vol. 16 pp. 121–159.
41. Lea PJ, Mifflin B. Alternative route for nitrogen assimilation in higher plants. *Nature*. 1974; 251: 614–616. PMID: [4423889](#)
42. Prunkard DE, Bascomb NF, Robinson RW, Schmidt RR. Evidence for chloroplastic localization of an ammonium inducible glutamate dehydrogenase and synthesis of its subunit from a cytosolic precursor-protein in *Chlorella sorokiniana*. *Plant Physiol*. 1986; 81: 349–355. PMID: [16664819](#)

43. Loulakakis CA, Roubelakis-Angelakis KA. Intracellular localization and properties of NADH-glutamate dehydrogenase from *Vitis vinifera* L: purification and characterization of the major leaf isoenzyme. *J Exp Bot.* 1990; 412: 1223–1230.
44. Masclaux-Daubresse C, Daniel-Vedele F, Dechorgnat J, Chardon F, Gaufichon L, Suzuki A. Nitrogen uptake, assimilation and remobilizations in plants: challenges for sustainable and productive agriculture. *Ann Bot.* 2010; 105: 1141–1157. doi: [10.1093/aob/mcq028](https://doi.org/10.1093/aob/mcq028) PMID: [20299346](https://pubmed.ncbi.nlm.nih.gov/20299346/)
45. Lopez-Maury L, Marquerat S, Bahler J. Tuning gene expression to changing environments: from rapid response to evolutionary adaptation. *Nat Rev Genet.* 2008; 9: 583–593. doi: [10.1038/nrg2398](https://doi.org/10.1038/nrg2398) PMID: [18591982](https://pubmed.ncbi.nlm.nih.gov/18591982/)
46. Kreps JA, Wu Y, Chang HS, Zhu T, Wang X, Harper JF. Transcriptome changes for *Arabidopsis* in response to salt, osmotic and cold stress. *Plant Physiol.* 2002; 130: 2129–2141. PMID: [12481097](https://pubmed.ncbi.nlm.nih.gov/12481097/)
47. Liu KH, Huang CY, Tsay YF. CHL1 is a dual-affinity nitrate transporter of *Arabidopsis* involved in multiple phases of nitrate uptake. *Plant Cell.* 1999; 11: 865–874. PMID: [10330471](https://pubmed.ncbi.nlm.nih.gov/10330471/)
48. Lin SH, Kuo HF, Canivenc G, Lin CS, Lepetit M, Hsu PK et al. Mutation of the *Arabidopsis* NRT1.5 nitrate transporter causes defective root-to-shoot nitrate transport. *Plant Cell.* 2008; 20: 2514–2528. doi: [10.1105/tpc.108.060244](https://doi.org/10.1105/tpc.108.060244) PMID: [18780802](https://pubmed.ncbi.nlm.nih.gov/18780802/)
49. Yao J, Shi WM, Xu WF. Effects of salt stress on expression of nitrate transporter and assimilation-related genes in tomato roots: effects of salt stress on expression of nitrate transporter and assimilation-related genes in tomato roots. *Russ J Plant Physiol.* 2008; 55: 232–240.
50. Xiong YC, Li FM, Zhang T. Performance of wheat crops with different chromosome ploidy: root-sourced signals, drought tolerance, and yield performance. *Planta.* 2006; 224: 710–718. PMID: [16506063](https://pubmed.ncbi.nlm.nih.gov/16506063/)
51. Krouk G, Tillard P, Gojon A. Regulation of the high-affinity NO<sub>3</sub><sup>-</sup> uptake system by NRT1.1-mediated NO<sub>3</sub><sup>-</sup> demand signalling in *Arabidopsis*. *Plant Physiol.* 2006; 142: 1075–1086. PMID: [16998085](https://pubmed.ncbi.nlm.nih.gov/16998085/)
52. Smirnov N, Stewart G. Nitrate assimilation and translocation by higher plants: comparative physiology and ecological consequences. *Physiol Plant.* 1985; 64: 133–140.
53. Hernandez LE, Garate A, Carpena-Ruiz R. Effects of cadmium on the uptake, distribution and assimilation of nitrate in *Pisum sativum*. *Plant Soil.* 1997; 189: 97–106.
54. Chen CJ, Lv XF, Li YJ, Yi HY, Gong JM. *Arabidopsis* NRT1.5 is another essential component in the regulation of nitrate reallocation and stress tolerance. *Plant Physiol.* 2012; 159: 1582–1590. doi: [10.1104/pp.112.199257](https://doi.org/10.1104/pp.112.199257) PMID: [22685171](https://pubmed.ncbi.nlm.nih.gov/22685171/)
55. Li JY, Fu YL, Pike SM, Bao J, Tian W, Zhang Y et al. The *Arabidopsis* nitrate transporter NRT1.8 functions in nitrate removal from the xylem sap and mediates cadmium tolerance. *Plant Cell.* 2010; 22: 1633–1646. doi: [10.1105/tpc.110.075242](https://doi.org/10.1105/tpc.110.075242) PMID: [20501909](https://pubmed.ncbi.nlm.nih.gov/20501909/)
56. Bai H, Euring D, Volmer K, Janz D, Polle A. The nitrate transporter (NRT) gene family in poplar. *PLoS One.* 2013; 8: e72126. doi: [10.1371/journal.pone.0072126](https://doi.org/10.1371/journal.pone.0072126) PMID: [23977227](https://pubmed.ncbi.nlm.nih.gov/23977227/)
57. Hu TZ, Cao KM, Xia M, Wang XP. Functional characterization of putative nitrate transporter gene promoter from rice. *Acta Biochem Biophys Sin (Shanghai).* 2006; 38: 795–802.
58. Crawford NM, Glass ADM. Molecular and physiological aspects of nitrate uptake in plants. *Cell.* 1998; 3: 389–395.
59. Li W, Wang Y, Okamoto M, Crawford NM, Siddiqi MY, Glas AD. Dissection of the AtNRT2.1: AtNRT2.2 inducible high-affinity nitrate transporter gene cluster. *Plant Physiol.* 2007; 143: 425–433. PMID: [17085507](https://pubmed.ncbi.nlm.nih.gov/17085507/)
60. Howitt SM, Udvardi MK, Susan M. Structure, function and regulation of ammonium transporters in plants. *Biochim Biophys Acta.* 2000; 1465: 152–170. PMID: [10748252](https://pubmed.ncbi.nlm.nih.gov/10748252/)
61. Betti M, Perez-Delgado C, Garcia-Caalderson M, Diaz P, Monza J, Marquez AJ. Cellular stress following water deprivation in the model legume *Lotus japonicus*. *Cells.* 2012; 1: 1089–1106. doi: [10.3390/cells1041089](https://doi.org/10.3390/cells1041089) PMID: [24710544](https://pubmed.ncbi.nlm.nih.gov/24710544/)
62. Meyer C, Stitt M. Nitrate reduction and signalling. In: Lea PJ, Morot-Gaudry JF, editors. *Plant Nitrogen*. Berlin: Springer-Verlag; 2001. pp. 61–78.
63. Stitt M, Scheible WR. Nitrate acts as a signal to control gene expression, metabolism and biomass allocation. *Proc Phytochem Soc Eur.* 1999; 42: 275–306.
64. Omarov RT, Sagi M, Lips SH. Regulation of aldehyde oxidase and nitrate reductase in roots of barley (*Hordeum vulgare* L.) by nitrogen source and salinity. *J Exp Bot.* 1998; 49: 897–902.
65. Abd-El Baki GK, Siefritz F, Man HM, Weiner H, Kaldenhoff R, Kaiser WM. Nitrate reductase in *Zea mays* L. under salinity. *Plant Cell Environ.* 2000; 23: 515–521.
66. Oyang B, Yang T, Li H, Zhang L, Zhang Y, Zhang J et al. Identification of early salt stress response genes in tomato root by suppression subtractive hybridization and microarray analysis. *J Exp Bot.* 2007; 58: 507–520. PMID: [17210988](https://pubmed.ncbi.nlm.nih.gov/17210988/)



67. Debouba M, Dquimi HM, Ghorbel M, Gouia H, Suzuki A. Expression pattern of genes encoding nitrate and ammonium assimilating enzymes in *Arabidopsis thaliana* exposed to short term NaCl stress. *J Plant Physiol.* 2013; 15: 155–160.
68. Flores P, Botella MA, Cerda A, Martinez V. Influence of nitrate level on nitrate assimilation in tomato (*Lycopersicon esculentum*) plants under saline stress. *Can J Bot.* 2004; 82: 207–213.
69. Carillo P, Mastrolonardo G, Nacca F, Fuggi A. Nitrate reductase in durum wheat seedlings as affected by nitrate nutrition and salinity. *Funct Plant Biol.* 2005; 32: 209–219.
70. Debouba M, Dquimi HM, Ghorbel M, Gouia H, Suzuki A. Expression pattern of genes encoding nitrate and ammonium assimilating enzymes in *Arabidopsis thaliana* exposed to short term NaCl stress. *J Plant Physiol.* 2013; 15: 155–160.
71. Yaneva IA, Hoffmann GW, Tischner R. Nitrate reductase from winter wheat leaves is activated at low temperature via protein dephosphorylation. *Physiol Plant.* 2002; 114: 65–72. PMID: [11982936](#)
72. Kolbert Z, Ortega L, Erdei L. Involvement of nitrate reductase (NR) in osmotic stress-induced NO generation of *Arabidopsis thaliana* L. roots. *J Plant Physiol.* 2010; 167: 77–80. doi: [10.1016/j.jplph.2009.08.013](#) PMID: [19822377](#)
73. Klimenko SB, Peshkova AA, Dorofeev NV. Nitrate reductase activity during heat shock in winter wheat. *J Stress Physiol Biochem.* 2006; 2: 50–55.
74. Texeira J, Fidalgo F. Salt stress affects glutamine synthetase activity and mRNA accumulation on potato plants in an organ-dependent manner. *Plant Physiol Biochem.* 2009; 47: 807–813. doi: [10.1016/j.plaphy.2009.05.002](#) PMID: [19481951](#)
75. Rana NK, Mohanpuria P, Yadav SK. Expression of tea cytosolic glutamine synthetase is tissue specific and induced by cadmium and salt stress. *Biol Plant.* 2008; 52: 361–364.
76. Santa-Cruz A, Acosta M, Rus A, Bolarin MC. Short term salt-tolerance mechanisms in differentially salt tolerant tomato species. *Plant Physiol Biochem.* 1999; 36: 65–71.
77. Cordovilla MDP, Ligerio F, Lluch C. Effects of salinity on growth, nodulation and nitrogen assimilation in nodules of faba bean (*Vicia faba* L.). *App Soil Ecol.* 1999; 11: 1–7.
78. Cordovilla MDP, Ligerio F, Lluch C. Effects of NaCl on growth and nitrogen fixation and assimilation of inoculated and KNO<sub>3</sub> fertilized *Vicia faba* L. and *Pisum sativum* L. plants. *Plant Sci.* 1999; 140: 127–136.
79. Soussi M, Ocana A, Lluch C. Effects of salt stress on growth, photosynthesis and nitrogen fixation in chick pea (*Cicer arietinum* L.). *J Exp Bot.* 1998; 49: 1329–1337.
80. El-Shora HM, Abo-Kaseem EM. Kinetic characterization of glutamate dehydrogenase of marrow cotyledons. *Plant Sci.* 2001; 161: 1047–1053.
81. Cammerts D, Jacobs M. A study of the role of glutamate dehydrogenase in the nitrogen metabolism of *Arabidopsis thaliana*. *Planta.* 1985; 163: 517–526. doi: [10.1007/BF00392709](#) PMID: [24249451](#)
82. Kumar RG, Shah K, Dubey RS. Salinity induced behavioural changes in malate dehydrogenase and glutamate dehydrogenase in rice seedlings of differing salt tolerance. *Plant Sci.* 2000; 156: 23–34. PMID: [10908802](#)
83. Skopelitis DS, Paranychiakis NV, Kouvarakis A, Spyros A, Stephanou EG, Roubelakis-Angelakis KA. The isoenzyme 7 of tobacco NAD(H)-dependent glutamate dehydrogenase exhibits high deaminating and low aminating activities in vivo. *Plant Physiol.* 2007; 145: 1726–1734. PMID: [17932305](#)
84. Sieciechowicz KA, Joy KW, Ireland RJ. The metabolism of asparagines in plants. *Phytochemistry.* 1998; 27: 663–671.
85. Fukutoku Y, Yamada Y. Sources of proline-nitrogen in water stressed soybean (*Glycine max*). II. Fate of <sup>15</sup>N-labeled protein. *Physiol Plant.* 1984; 61: 622–628.
86. Gilbert GA, Gadush MV, Wilson C, Madore MA. Amino acid accumulation in sink and source tissues of *Coleus blumei* Benth. during salinity stress. *J Exp Bot.* 1997; 49: 107–114.
87. Chevalier C, Bourgeois E, Just D, Raymond P. Metabolic regulation of asparagine synthetase gene expression in maize (*Zea mays* L.) root tips. *Plant J.* 1996; 9: 1–11. PMID: [8580967](#)
88. Wong HK, Chan HK, Coruzzi GM, Lam HM. Correlation of ASN2 gene expression with ammonium metabolism in *Arabidopsis*. *Plant Physiol.* 2004; 134: 332–338. PMID: [14671018](#)
89. Herrera-Rodriguez MB, Maldonado JM, Perez-Vicente R. Role of asparagine and asparagine synthetase genes in sunflower (*Helianthus annuus*) germination and natural senescence. *J Plant Physiol.* 2006; 163: 1061–1070. PMID: [16368161](#)
